# Supplementary material for: Interlayer engineering of a V2O5 anode toward high-rate and durable dual-ion batteries
Source: Royal Society of Chemistry journal article supplement (doi:10.1039/d2qi02080g), 2022-11-09
Supplement: d2qi02080g1.pdf [file d2qi02080g1.pdf]

## Supporting Information

### Interlayer Engineering of V<sub>2</sub>O<sub>5</sub> Anode toward High Rate and Durable Dual Ion Batteries

Wenda Qiu,<sup>‡\*a,b</sup> Yunlei Tian,<sup>‡a</sup> Shuting Lin,<sup>a</sup> Aihua Lei,<sup>a</sup> Zhangqi Geng,<sup>a</sup> Kaitao Huang,<sup>a</sup> Jiancong Chen,<sup>a</sup> Fuchun Huang,<sup>a</sup> Huajie Feng<sup>\*c</sup> and Xihong Lu<sup>\*b</sup>

*Guangdong Industry Polytechnic College, Guangzhou 510300, Guangdong, China*

*<sup>b</sup> MOE of the Key Laboratory of Bioinorganic and Synthetic Chemistry, KLGHEI of Environment and Energy Chemistry, School of Chemistry, Sun Yat-Sen University, Guangzhou 510275, Guangdong, China*

*<sup>c</sup> Key Laboratory of Electrochemical Energy Storage and Energy Conversion of Hainan Province, Hainan Normal University, Haikou 571158, Hainan, China*

**\*Corresponding Author.**

*E-mail:* qiuwd3@mail3.sysu.edu.cn (W.D. Qiu), Fenghuajiehk@163.com (H.J. Feng),

luxh6@mail.sysu.edu.cn (X.H. Lu)

<sup>‡</sup> These authors contributed equally to this work.

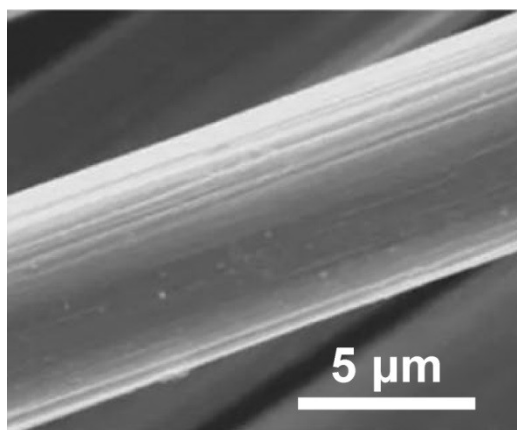

**Figure S1.** SEM image of carbon fiber cloth

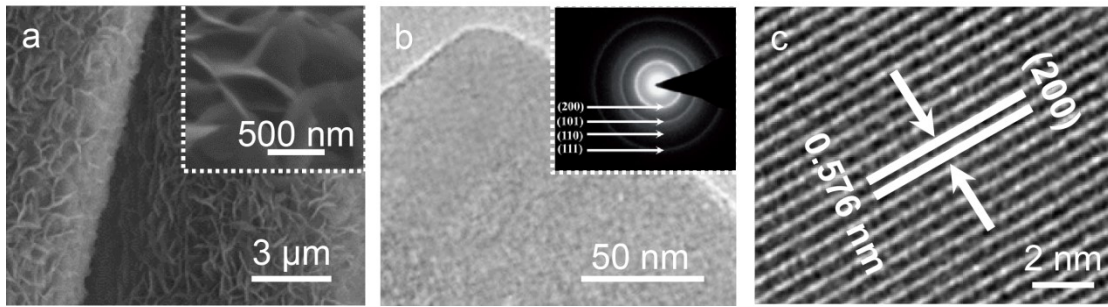

**Figure S2.** (a) SEM images, (b) TEM images (inset is the SAED pattern), and (c) HRTEM images of  $\alpha$ -V<sub>2</sub>O<sub>5</sub> NS.

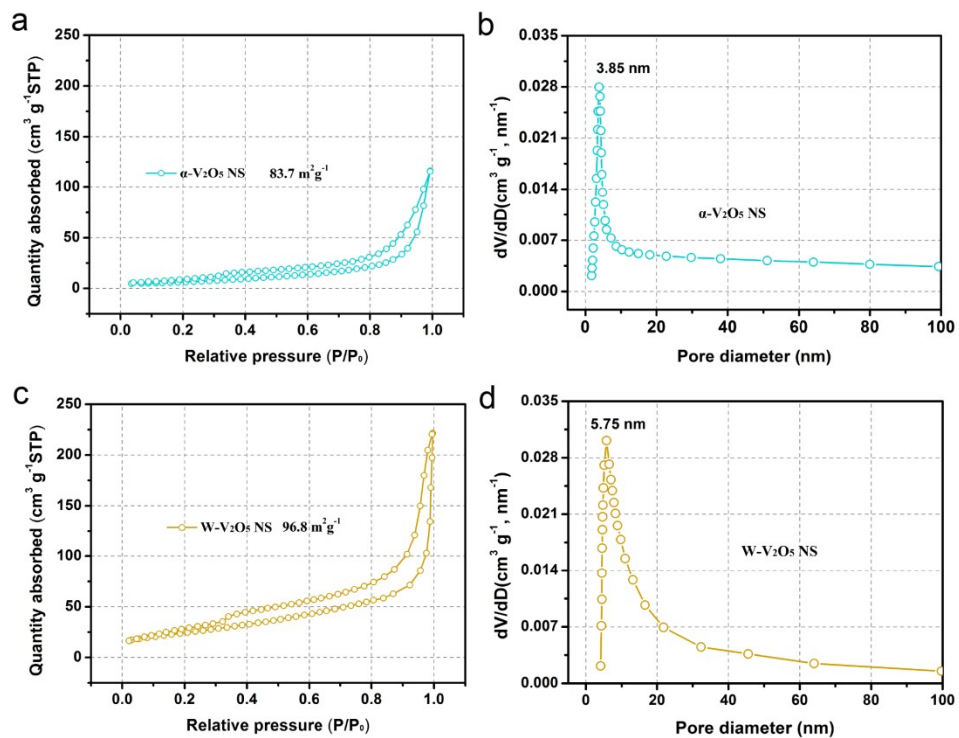

**Figure S3.** N<sub>2</sub> adsorption-desorption isotherm of (a)  $\alpha$ -V<sub>2</sub>O<sub>5</sub> and (c) W-V<sub>2</sub>O<sub>5</sub> NS. The pore size distribution of (b)  $\alpha$ -V<sub>2</sub>O<sub>5</sub> and (d) W-V<sub>2</sub>O<sub>5</sub> NS.

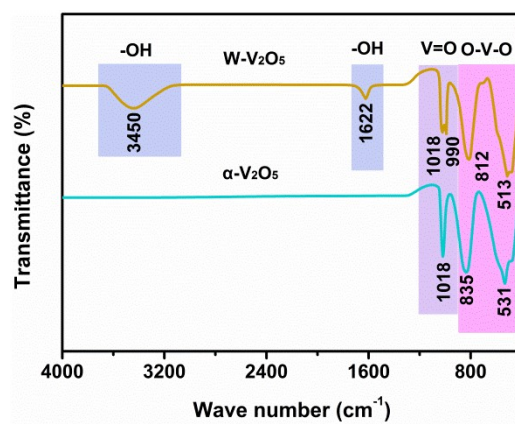

**Figure S4.** FTIR spectra of  $\alpha$ -V<sub>2</sub>O<sub>5</sub> and W-V<sub>2</sub>O<sub>5</sub> NS.

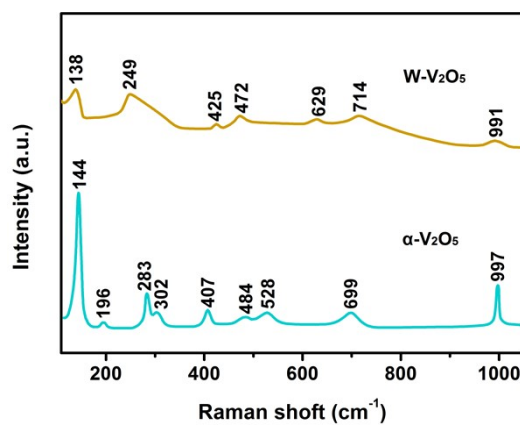

**Figure S5.** Raman spectra of  $\alpha$ -V<sub>2</sub>O<sub>5</sub> and W-V<sub>2</sub>O<sub>5</sub> NS.

**Table S1.** Raman peak assignment for  $\alpha$ -V<sub>2</sub>O<sub>5</sub> and W-V<sub>2</sub>O<sub>5</sub> NS.

| Vibration modes                                                    | Raman shift (cm <sup>-1</sup> )            |                                    |
|--------------------------------------------------------------------|--------------------------------------------|------------------------------------|
|                                                                    | $\alpha$ -V <sub>2</sub> O <sub>5</sub> NS | W-V <sub>2</sub> O <sub>5</sub> NS |
| Bending vibrations (B <sub>1g</sub> ,<br>B <sub>2g</sub> of O–V–O) | 144                                        | 138                                |
| Bending vibrations (A <sub>g</sub> ,<br>B <sub>2g</sub> of O–V–O)  | 196                                        |                                    |
| Bending vibrations (B <sub>2g</sub> of<br>V=O)                     | 283                                        | 249                                |
| Bending vibration (A <sub>g</sub> of<br>V–O)                       | 302                                        |                                    |
| Bending vibrations (A <sub>g</sub> of<br>V=O)                      | 407                                        | 425, 472                           |
| Stretching vibration (A <sub>g</sub> of<br>V <sub>3</sub> -O)      | 484                                        |                                    |
| Stretching vibration (A <sub>g</sub> of<br>V <sub>3</sub> -O)      | 528                                        |                                    |
| Stretching vibration (B <sub>3g</sub><br>of V <sub>2</sub> -O)     | 699                                        | 629,714                            |
| Stretching vibration (A <sub>g</sub> of<br>V=O)                    | 997                                        | 991                                |

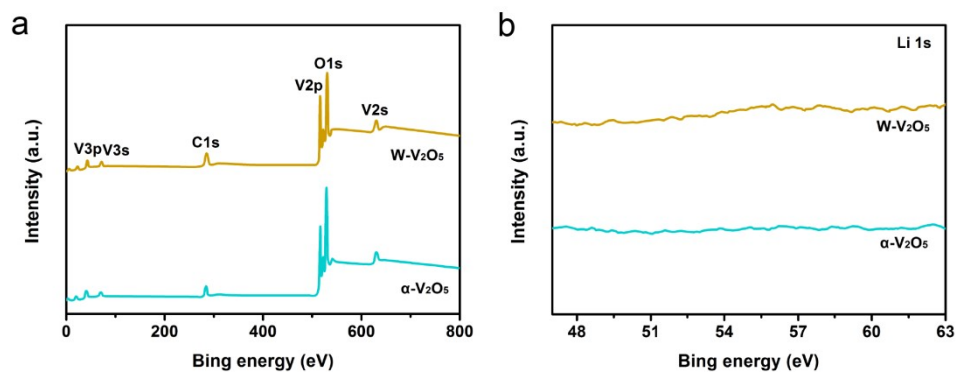

**Figure S6.** (a) Survey and (b) Li 1s XPS spectra of  $\alpha$ -V<sub>2</sub>O<sub>5</sub> and W-V<sub>2</sub>O<sub>5</sub> NS.

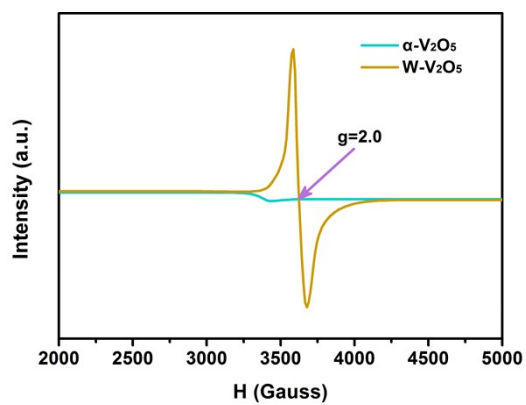

**Figure S7.** EPR spectra of  $\alpha$ -V<sub>2</sub>O<sub>5</sub> and W-V<sub>2</sub>O<sub>5</sub> NS.

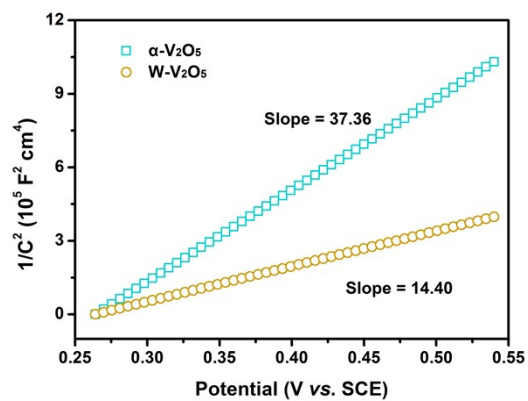

**Figure S8.** Mott-Schottky plots of  $\alpha$ -V<sub>2</sub>O<sub>5</sub> and W-V<sub>2</sub>O<sub>5</sub> NS.

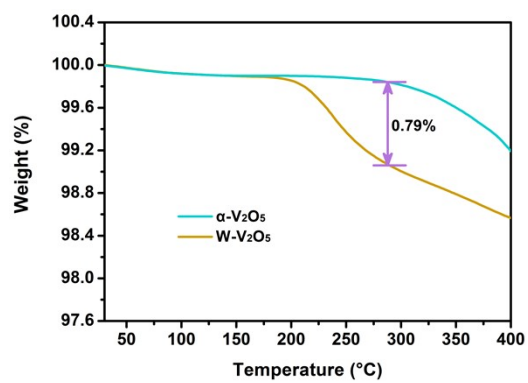

**Figure S9.** TGA curves of  $\alpha$ -V<sub>2</sub>O<sub>5</sub> and W-V<sub>2</sub>O<sub>5</sub> NS measured in argon atmosphere.

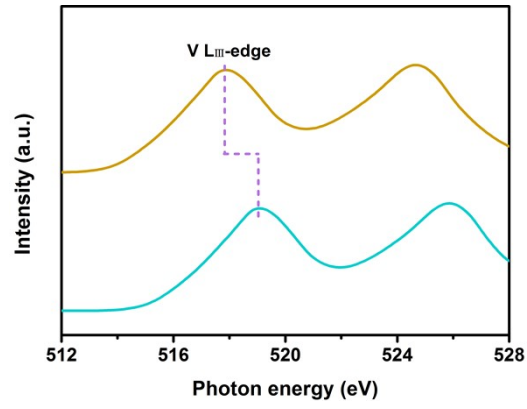

**Figure S10.** V L edges XANES spectra of  $\alpha$ -V<sub>2</sub>O<sub>5</sub> and W-V<sub>2</sub>O<sub>5</sub> NS.

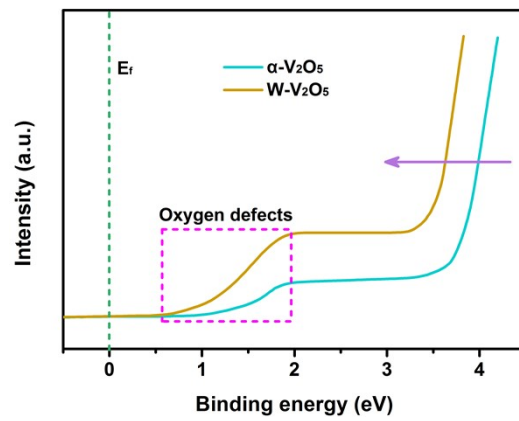

**Figure S11.** UPS spectra of  $\alpha$ -V<sub>2</sub>O<sub>5</sub> and W-V<sub>2</sub>O<sub>5</sub> NS.

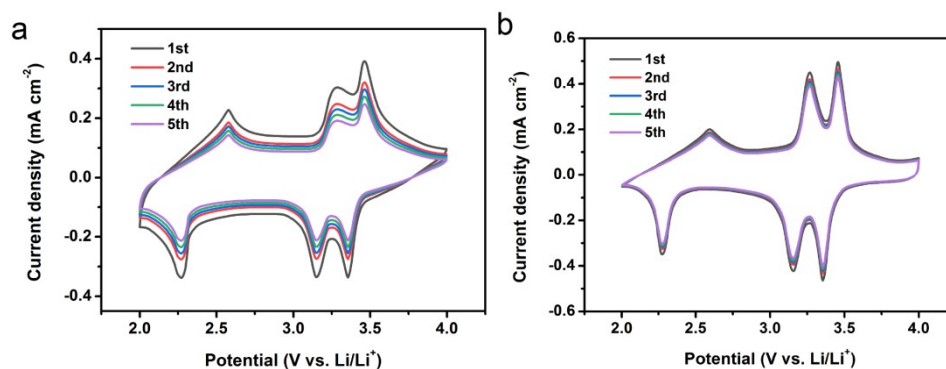

**Figure S12.** The CV curves at a scan rate of  $0.2 \text{ mV s}^{-1}$  for the first five cycles of (a)  $\alpha$ -V<sub>2</sub>O<sub>5</sub> and (b) W-V<sub>2</sub>O<sub>5</sub> NS.

**Table S2.** Comparison of electrochemical performance of W-V<sub>2</sub>O<sub>5</sub> NS and the other V<sub>2</sub>O<sub>5</sub>-based electrodes.

| Electrode                                       | Specific capacity                  | Rate performance        | Cycling stability              | Ref.             |
|-------------------------------------------------|------------------------------------|-------------------------|--------------------------------|------------------|
| W-V <sub>2</sub> O <sub>5</sub> NS              | 293 mA h g <sup>-1</sup> at 1 C    | 47.8% (1 to 40 C)       | 96.8% after 2000 cycles at 1C  | <b>This work</b> |
| Mn <sub>0.1</sub> V <sub>2</sub> O <sub>5</sub> | 265 mA h g <sup>-1</sup> at 0.1 C  | 61.9% (0.1 to 20 C)     | 94% after 500 cycles at 3 C    | 1                |
| V <sub>2</sub> O <sub>5</sub> -cG               | 291 mA h g <sup>-1</sup> at 0.33 C | 56.4% (0.33 to 16.67 C) | 94% after 200 cycles at 6.67 C | 2                |
| 3D-V <sub>2</sub> O <sub>5</sub>                | 267 mA h g <sup>-1</sup> at        | 51.2% (1 to 20 C)       | 93% after 50 cycles            | 3                |



|                                     |                             |                   |                      |    |
|-------------------------------------|-----------------------------|-------------------|----------------------|----|
|                                     | 0.5 C                       |                   | at 0.5 C             |    |
| 3S-V <sub>2</sub> O <sub>5</sub>    | 287.5 mA h g <sup>-1</sup>  | 83% (0.33 to 3.33 | 92.8% after 200      | 4  |
| HoMSs/Ni                            | at 1.67 C                   | C)                | cycles at 1.67 C     |    |
| V <sub>2</sub> O <sub>5</sub> /G    | 291 mA h g <sup>-1</sup> at | 48.7% (1 to 100   | 92.8% after 600      | 5  |
|                                     | 0.1 C                       | C)                | cycles at 10 C       |    |
| V <sub>2</sub> O <sub>5</sub> /CNT  | 242.3 mA h g <sup>-1</sup>  | 27.5% (0.2 to 20  | 92.3% after 80       | 6  |
|                                     | at 0.2 C                    | C)                | cycles at 0.2 C      |    |
| V <sub>2</sub> O <sub>5</sub> @G    | 224 mA h g <sup>-1</sup> at | 40.2% (0.1 to 100 | 91.7% after 200      | 7  |
|                                     | 0.1 C                       | C)                | cycles at 0.5 C      |    |
| V <sub>2</sub> O <sub>5</sub>       | 265.9 mA h g <sup>-1</sup>  | 48.9% (0.1 to 2   | 91% after 100 cycles | 8  |
|                                     | at 0.1 C                    | C)                | at 0.33 C            |    |
| Ni-V <sub>2</sub> O <sub>5</sub>    | 294 mA h g <sup>-1</sup> at | 56.5% (0.17 to 8  | 91% after 50 cycles  | 9  |
|                                     | 0.17 C                      | C)                | at 1 C               |    |
| V <sub>2</sub> O <sub>5</sub> /MWCT | 292 mA h g <sup>-1</sup> at | 47.3% (0.2 to 4   | 90% after 100 cycles | 10 |
|                                     | 0.1 C                       | C)                | at 1 C               |    |
| yolk-shelled                        |                             |                   |                      |    |
| V <sub>2</sub> O <sub>5</sub>       | 262 mA h g <sup>-1</sup> at | 65% (0.33 to 8 C) | 89% after 50 cycles  | 11 |
| microspheres                        | 0.33 C                      |                   | at 1 C               |    |
| V <sub>2</sub> O <sub>5</sub> yolk- |                             |                   |                      |    |
| shell                               | 275 mA h g <sup>-1</sup> at | 58% (0.6 to 6.7   | 87.6% after 50       | 12 |
| microsphere                         | 0.67 C                      | C)                | cycles at 0.17 C     |    |

|                                                                 |                                       |                           |                                     |    |
|-----------------------------------------------------------------|---------------------------------------|---------------------------|-------------------------------------|----|
| V <sub>2</sub> O <sub>5</sub><br>nanoflowers<br>arrays@PRC      | 281 mA h g <sup>-1</sup> at<br>0.2 C  | 49.8% (0.2 to 10<br>C)    | 87.5% after 500<br>cycles at 2 C    | 13 |
| V <sub>2</sub> O <sub>5</sub> hollow<br>sphere arrays           | 293 mA h g <sup>-1</sup> at<br>0.5 C  | 51.9% (0.5 to 20<br>C)    | 87.4% after 300<br>cycles at 5 C    | 14 |
| V <sub>2</sub> O <sub>5</sub><br>nanobelts                      | 281 mA h g <sup>-1</sup> at<br>0.2 C  | 33.2% (0.5 to 20<br>C)    | 86% after 50 cycles<br>at 0.2 C     | 15 |
| V <sub>2</sub> O <sub>5</sub> @GCNF<br>s                        | 293 mA h g <sup>-1</sup> at<br>0.1 C  | 36.2% (0.1 to 20<br>C)    | 85.7% after 700<br>cycles at 5 C    | 16 |
| V <sub>2</sub> O <sub>5</sub><br>nanosheets                     | 275 mA h g <sup>-1</sup> at<br>0.2 C  | 76% (0.2 to 2 C)          | 82.4% after 250<br>cycles at 0.33 C | 17 |
| rGO/V <sub>2</sub> O <sub>5</sub>                               | 249 mA h g <sup>-1</sup> at<br>0.33 C | 45.4% (0.33 to 5<br>C)    | 81.5% after 200<br>cycles at 5 C    | 18 |
| H-V <sub>2</sub> O <sub>5</sub><br>nanosheets                   | 259 mA h g <sup>-1</sup> at<br>0.33 C | 54.8% (0.33 to<br>6.67 C) | 81% after 200 cycles<br>at 0.33 C   | 19 |
| Interconnected<br>V <sub>2</sub> O <sub>5</sub><br>microspheres | 278 mA h g <sup>-1</sup> at<br>0.5 C  | 59.7% (0.5 to 10<br>C)    | 81% after 200 cycles<br>at 1 C      | 20 |
| HP- V <sub>2</sub> O <sub>5</sub>                               | 283 mA h g <sup>-1</sup> at<br>0.33 C | 42% (0.33 to 6.67<br>C)   | 80.2% after 200<br>cycles at 3.33 C | 21 |

|                                                     |                                         |                           |                                     |    |
|-----------------------------------------------------|-----------------------------------------|---------------------------|-------------------------------------|----|
| SANs V <sub>2</sub> O <sub>5</sub>                  | 235.5 mA h g <sup>-1</sup><br>at 1 C    | 26.6% (0.1 to 10<br>C)    | 78.6% after 300<br>cycles at 2 C    | 22 |
| V <sub>2</sub> O <sub>5</sub><br>microsphere        | 210.5 mA h g <sup>-1</sup><br>at 0.33 C | 44.6% (0.33 to<br>3.33 C) | 76.2% after 150<br>cycles at 1 C    | 23 |
| V <sub>2</sub> O <sub>5</sub> -II                   | 285 mA h g <sup>-1</sup> at<br>0.33 C   | 55.3% (0.33 to 10<br>C)   | 75.8% after 100<br>cycles at 1 C    | 24 |
| V <sub>2</sub> O <sub>5</sub> /N-<br>graphene       | 273 mA h g <sup>-1</sup> at<br>0.33 C   | 66.3% (0.33 to<br>3.33 C) | 75.1% after 100<br>cycles at 0.33 C | 24 |
| Sisal-like<br>V <sub>2</sub> O <sub>5</sub>         | 261 mA h g <sup>-1</sup> at<br>0.2 C    | 35.4% (0.1 to 10<br>C)    | 74.8% after 400<br>cycles at 1 C    | 25 |
| V <sub>2</sub> O <sub>5</sub> hollow<br>microsphere | 250 mA h g <sup>-1</sup> at<br>1 C      | 56% (1 to 10 C)           | 68.8% after 100<br>cycles at 1 C    | 26 |
| V <sub>2</sub> O <sub>5</sub> NAs/CC                | 268 mA h g <sup>-1</sup> at<br>0.33 C   | 46.5% (0.33 to 15<br>C)   | 67% after 100 cycles<br>at 2 C      | 27 |
| V <sub>2</sub> O <sub>5</sub> /MWNT/<br>PAN         | 285 mA h g <sup>-1</sup> at<br>1 C      | 46.3% (1 to 20 C)         | 66% after 100 cycles<br>at 1 C      | 28 |

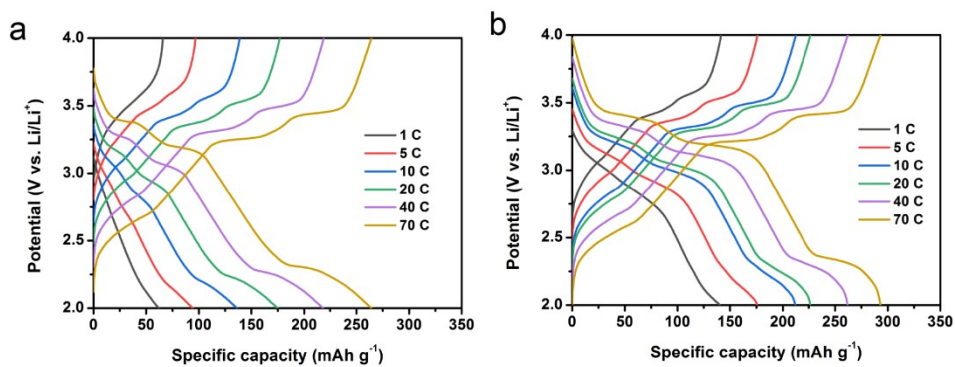

**Figure S13.** The charge and discharge profiles at different current densities for (a)  $\alpha$ -V<sub>2</sub>O<sub>5</sub> and (b) W-V<sub>2</sub>O<sub>5</sub> NS electrodes.

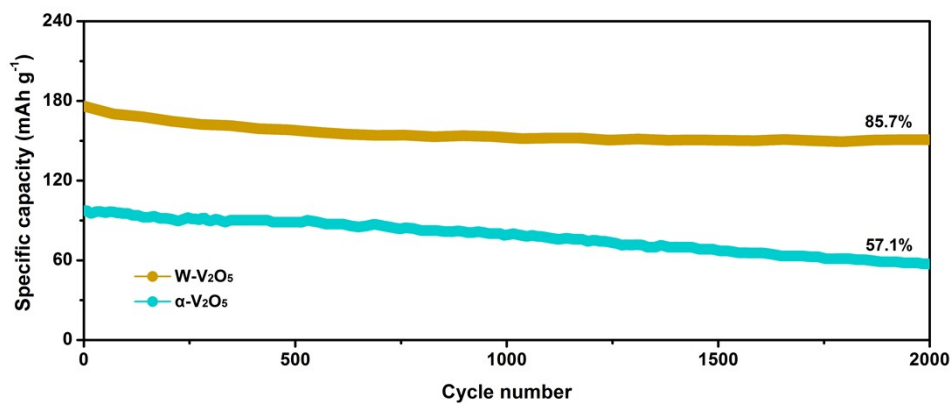

**Figure S14.** Cycling performance of  $\alpha$ -V<sub>2</sub>O<sub>5</sub> and W-V<sub>2</sub>O<sub>5</sub> NS at high current density of 40 C.

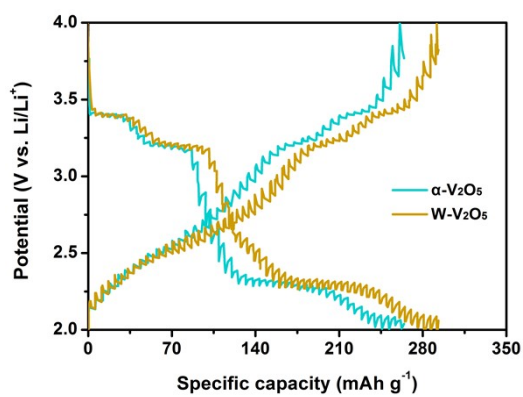

**Figure S15.** GITT charge discharge curves of  $\alpha$ -V<sub>2</sub>O<sub>5</sub> and W-V<sub>2</sub>O<sub>5</sub> NS electrodes at 1

C.

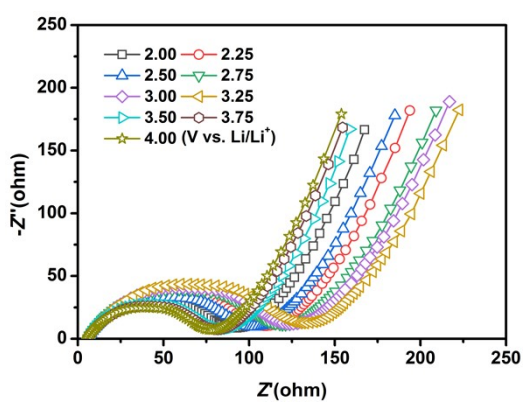

**Figure S16.** Nyquist plots of  $\alpha$ -V<sub>2</sub>O<sub>5</sub> NS electrode at different potentials.

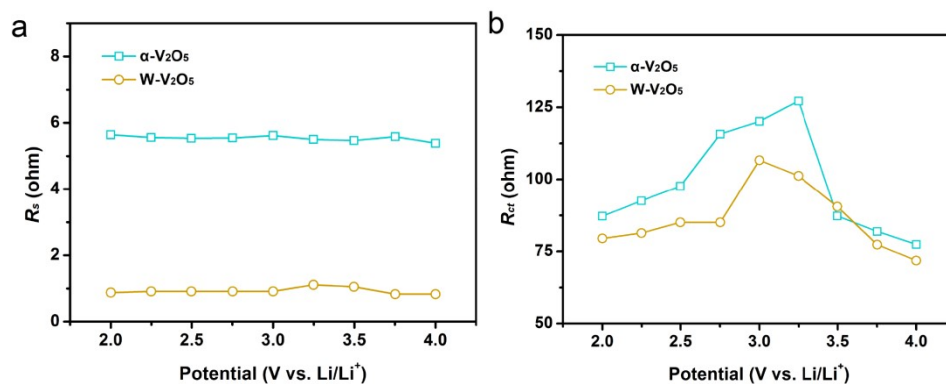

**Figure S17.** (a)  $R_s$  and (b)  $R_{ct}$  of  $\alpha$ - $V_2O_5$  and  $W$ - $V_2O_5$  NS electrodes as a function of potential.

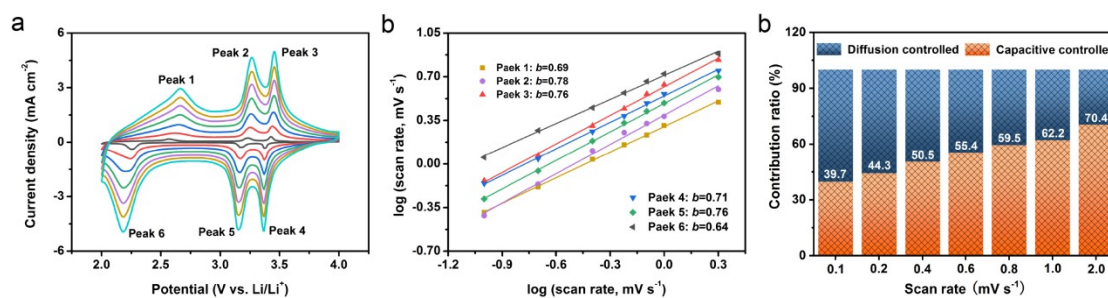

**Figure S18.** (a) CV curves at different scan rates, (b)  $\log(i)$  vs.  $\log(v)$  plots at six peaks in (a), (c) Surface capacitive contributions of  $\alpha$ - $V_2O_5$  NS electrode at various scan rates.

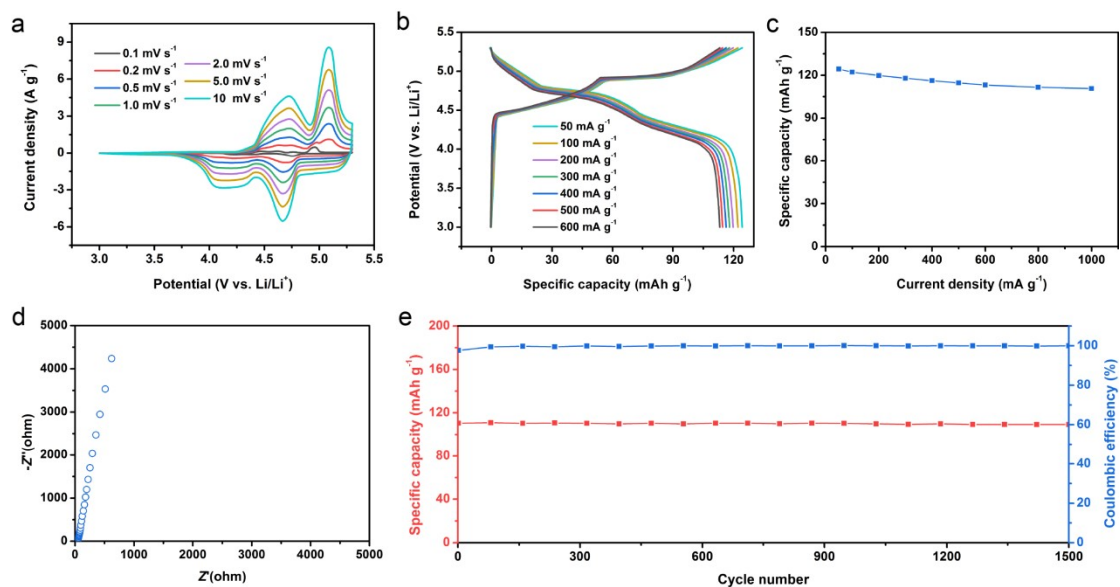

**Figure S19.** Electrochemical performance of the graphite cathode tested in half cell. (a) CV curves collected at various scan rates, (b) GCD curves measured at different current density, (c) Specific capacity as a function of current density, (d) Nyquist plots, and (e) cycling performance at 1000 mA g<sup>-1</sup>.

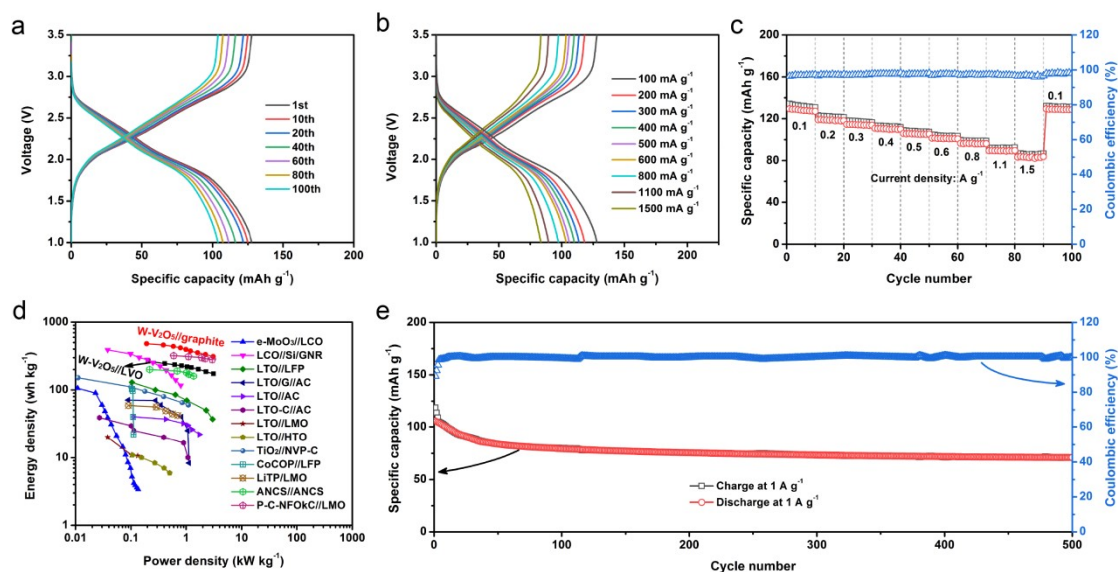

**Figure S20.** Electrochemical performance of W-V<sub>2</sub>O<sub>5</sub>//Li<sub>3</sub>VO<sub>4</sub> device. (a) GCD curves of various cycle number at 100 mA g<sup>-1</sup>, (b) GCD curves measured at different current density, (c) rate capability and Coulombic efficiency. (d) Ragone plots of W-V<sub>2</sub>O<sub>5</sub>//Li<sub>3</sub>VO<sub>4</sub> device in comparison with the recently reported lithium ion batteries devices, and (e) cycle durability at 1 A g<sup>-1</sup>.

## References

1. C. Peng, F. Xiao, J. Yang, Z.h. Li, G.t. Lei, Q.z. Xiao, Y.h. Ding and Z.L. Hu, Carbon-encapsulated Mn-doped V<sub>2</sub>O<sub>5</sub> nanorods with long span life for high-power rechargeable lithium batteries. *Electrochim. Acta*, 2016, **192**, 216-226.
2. B. Yan, X.F. Li, Z.M. Bai, Y. Zhao, L. Dong, X.S. Song, D.J. Li, C. Langford and X.L. Sun, Crumpled reduced graphene oxide conformally encapsulated hollow V<sub>2</sub>O<sub>5</sub> nano/microsphere achieving brilliant lithium storage performance. *Nano*



- Energy*, 2016, **24**, 32-44.
3. Q.F. Li, D. Chen, H.T. Tan, X.H. Zhang, X.H. Rui and Y. Yu, 3D porous V<sub>2</sub>O<sub>5</sub> architectures for high-rate lithium storage. *J. Energy Chem.*, 2020, **40**, 15-21.
  4. Y.J. Zhu, M. Yang, Q.Y. Huang, D.R. Wang, R.B. Yu, J.Y. Wang, Z.J. Zheng and D. Wang, V<sub>2</sub>O<sub>5</sub> textile cathodes with high capacity and stability for flexible lithium - ion batteries. *Adv. Mater.*, 2020, **32**, 1906205.
  5. J. Zeng, J.D. Huang, J. Liu, T. Xie, C.Q. Peng, Y.K. Lu, P.J. Lu, R.Z. Zhang and J. Min, Self-assembly of single layer V<sub>2</sub>O<sub>5</sub> nanoribbon/graphene heterostructures as ultrahigh-performance cathode materials for lithium-ion batteries. *Carbon*, 2019, **154**, 24-32.
  6. Q. Li, Y.F. Chen, J.R. He, F. Fu, F. Qi, J. Lin and W.L. Zhang, Carbon Nanotube Modified V<sub>2</sub>O<sub>5</sub> Porous Microspheres as Cathodes for High-Performance Lithium-Ion Batteries. *Energy Technol.*, 2017, **5**, 665-669.
  7. D.B. Kong, X.L. Li, Y.B. Zhang, X. Hai, B. Wang, X.Y. Qiu, Q. Song, Q.H. Yang and L.J. Zhi, Encapsulating V<sub>2</sub>O<sub>5</sub> into carbon nanotubes enables the synthesis of flexible high-performance lithium ion batteries. *Energy Environ Sci.*, 2016, **9**, 906-911.
  8. J.M. Son, S. Oh, S.H. Bae, S. Nam and I.K. Oh, A Pair of NiCo<sub>2</sub>O<sub>4</sub> and V<sub>2</sub>O<sub>5</sub> Nanowires Directly Grown on Carbon Fabric for Highly Bendable Lithium - Ion Batteries. *Adv. Energy Mater.*, 2019, **9**, 1900477.
  9. Y.Z. Zheng, H.Y. Ding, E. Uchaker, X. Tao, J.F. Chen, Q.F. Zhang and G.Z. Cao, Nickel-mediated polyol synthesis of hierarchical V<sub>2</sub>O<sub>5</sub> hollow microspheres with

- enhanced lithium storage properties. *J. Mater. Chem. A*, 2015, **3**, 1979-1985.
10. B. Sun, K. Huang, X. Qi, X.L. Wei and J.X. Zhong, Rational Construction of a Functionalized V<sub>2</sub>O<sub>5</sub> Nanosphere/MWCNT Layer-by-Layer Nanoarchitecture as Cathode for Enhanced Performance of Lithium-Ion Batteries. *Adv. Funct. Mater.*, 2015, **25**, 5633-5639.
  11. A.Q. Pan, H.B. Wu, L. Yu and X.W. Lou, Template - free synthesis of VO<sub>2</sub> hollow microspheres with various interiors and their conversion into V<sub>2</sub>O<sub>5</sub> for lithium-ion batteries. *Angew. Chem.*, 2013, **125**, 2282-2286.
  12. Y.F. Dou, X. Liang, G.H. Gao and G.M. Wu, Template-free synthesis of porous V<sub>2</sub>O<sub>5</sub> yolk-shell microspheres as cathode materials for lithium ion batteries. *J. Alloy. Compd.*, 2018, **735**, 109-116.
  13. H. Tan, X.Z. Yu, K. Huang, J.X. Zhong and B.A. Lu, Large-scale carambola-like V<sub>2</sub>O<sub>5</sub> nanoflowers arrays on microporous reed carbon as improved electrochemical performances lithium-ion batteries cathode. *J. Energy Chem.*, 2020, **51**, 388-395.
  14. M.H. Chen, X.H. Xia, J.F. Yuan, J.H. Yin and Q.G. Chen, Free-standing three-dimensional continuous multilayer V<sub>2</sub>O<sub>5</sub> hollow sphere arrays as high-performance cathode for lithium batteries. *J. Power Sources*, 2015, **288**, 145-149.
  15. X.H. Rui, Y.X. Tang, O.I. Malyi, A. Gusak, Y.Y. Zhang, Z.Q. Niu, H.T. Tan, C. Persson, X.D. Chen, Z. Chen and Q.Y. Yan, Ambient dissolution–recrystallization towards large-scale preparation of V<sub>2</sub>O<sub>5</sub> nanobelts for high-energy battery applications. *Nano Energy*, 2016, **22**, 583-593.

16. S. Wang, P.Y. Zhang, H. Tan, X.Y. Fan and K. Huang,  $V_2O_5$  nanosheets anchored on graphitized carbon nanofibers network for free-standing cathode on performance-improved lithium ion batteries. *J. Power Sources*, 2019, **419**, 106-111.
17. G.Z. Li, Y.C. Qiu, Y. Hou, H.F. Li, L.S. Zhou, H. Deng and Y.G. Zhang, Synthesis of  $V_2O_5$  hierarchical structures for long cycle-life lithium-ion storage. *J. Mater. Chem. A*, 2015, **3**, 1103-1109.
18. N. Xu, J.Q. Liang, T. Qian, T.Z. Yang and C.L. Yan, Half-cell and full-cell applications of horizontally aligned reduced oxide graphene/ $V_2O_5$  sheets as cathodes for high stability lithium-ion batteries. *RSC Adv.*, 2016, **6**, 98581-98587.
19. X. Peng, X.M. Zhang, L. Wang, L.S. Hu, S.H.S. Cheng, C. Huang, B. Gao, F. Ma, K.F. Huo and P.K. Chu, Hydrogenated  $V_2O_5$  nanosheets for superior lithium storage properties. *Adv. Funct. Mater.*, 2016, **26**, 784-791.
20. M.M. Rahman, A.Z. Sadek, I. Sultana, M. Srikanth, X.J. Dai, M.R. Field, D.G. McCulloch, S.B. Ponraj and Y. Chen, Self-assembled  $V_2O_5$  interconnected microspheres produced in a fish-water electrolyte medium as a high-performance lithium-ion-battery cathode. *Nano Res.*, 2015, **8**, 3591-3603.
21. L.Q. Mai, Q.Y. An, Q.L. Wei, J.Y. Fei, P.F. Zhang, X. Xu, Y.L. Zhao, M.Y. Yan, W. Wen and L. Xu, Nanoflakes-Assembled Three-Dimensional Hollow-Porous  $V_2O_5$  as Lithium Storage Cathodes with High-Rate Capacity. *Small*, 2014, **10**, 3032-3037.
22. J.F. Huang, X.N. Qiao, Z.W. Xu, L.Y. Cao, H.B. Ouyang, J.Y. Li and R.Y. Wang,

- V<sub>2</sub>O<sub>5</sub> self-assembled nanosheets as high stable cathodes for Lithium-ion batteries. *Electrochim. Acta*, 2016, **191**, 158-164.
23. S.K. Park, P. Nakhanivej, J.S. Yeon, K.H. Shin, W.M. Dose, M. De Volder, J.B. Lee, H.J. Kim and H.S. Park, Electrochemical and structural evolution of structured V<sub>2</sub>O<sub>5</sub> microspheres during Li-ion intercalation. *J. Energy Chemistry*, 2021, **55**, 108-113.
24. X.T. Gao, X.D. Zhu, S.R. Le, D.J. Yan, C.Y. Qu, Y.J. Feng, K.N. Sun and Y.T. Liu, Boosting High-Rate Lithium Storage of V<sub>2</sub>O<sub>5</sub> Nanowires by Self-Assembly on N-Doped Graphene Nanosheets. *ChemElectroChem*, 2016, **3**, 1730-1736.
25. N.T. Wu, W.Z. Du, G.L. Liu, Z. Zhou, H.R. Fu, Q.Q. Tang, X.M. Liu and Y.B. He, Synthesis of hierarchical sisal-like V<sub>2</sub>O<sub>5</sub> with exposed stable {001} facets as long life cathode materials for advanced lithium-ion batteries. *ACS Appl. Mater. Interfaces*, 2017, **9**, 43681-43687.
26. Y.L. Shan, L. Xu, Y.J. Hu, H. Jiang and C.Z. Li, Internal-diffusion controlled synthesis of V<sub>2</sub>O<sub>5</sub> hollow microspheres for superior lithium-ion full batteries. *Chem. Eng. Sci.*, 2019, **200**, 38-45.
27. K. Ma, X. Liu, Q.L. Cheng, P. Saha, H. Jiang and C.Z. Li, Flexible textile electrode with high areal capacity from hierarchical V<sub>2</sub>O<sub>5</sub> nanosheet arrays. *J. Power Sources*, 2017, **357**, 71-76.
28. J.H. Lee, J.M. Kim, J.H. Kim, Y.R. Jang, J.A. Kim, S.H. Yeon and S.Y. Lee, Toward Ultrahigh - Capacity V<sub>2</sub>O<sub>5</sub> Lithium-Ion Battery Cathodes via One-Pot Synthetic Route from Precursors to Electrode Sheets. *Adv. Mater. Interfaces*, 2016,

3, 1600173.
